# Supplementary material
Source: Springer Nature journal article supplement (https://www.springermedizin.de/resource/supplementary/12936_2012_2542_MOESM2_ESM.pdf/9543250)
Supplement: MOESM2 [file 9543250]

Febrile patients presented to the health center ( $n= 1185$ )

Patients who had confirmed uncomplicated malaria ( $n=251$ )

*P. falciparum* malaria ( $n=204$ )

*P. vivax* malaria ( $n =43$ )

Mixed *P. falciparum* and *P. vivax* malaria ( $n=4$ )

Lost to follow-up ( $n=5$ )

Completed the 28 days of follow-up ( $n=38$ )

Had adequate clinical and parasitological response ( $n=38$ )
